# Supplementary material for: Assessment of Dengue and Chikungunya Infections among Febrile Patients Visiting Four Healthcare Centres in Yaoundé and Dizangué, Cameroon
Source: MDPI journal article supplement (doi:10.3390/v14102127), 2022-09-27
Supplement: s1 [file s1]

| Patient | age | sex | Serotype | Ct value      |
|---------|-----|-----|----------|---------------|
| 1       | 16  | M   | 3        | 22.61         |
| 2       | 11  | F   | 3        | 26.55         |
| 3       | 19  | F   | 3        | 28.69         |
| 4       | 39  | F   | 3        | 27.25         |
| 5       | 58  | F   | 3        | 27.09         |
| 6       | 25  | M   | 4        | 27.46         |
| 7       | 22  | F   | 3        | 27.77         |
| 8       | 12  | M   | 3 + 4    | 24.71 / 11.75 |
| 9       | 15  | F   | 3        | 15.65         |
| 10      | 12  | F   | 3        | 27.78         |
| 11      | 14  | F   | 3        | 22.34         |
| 12      | 11  | F   | 3        | 27.85         |
| 13      | 35  | M   | 3 + 4    | 27.61 / 27.14 |
| 14      | 19  | F   | 3        | 19.98         |
| 15      | 10  | M   | 3        | 27.46         |
| 16      | 23  | M   | 3 + 4    | 21.81 / 29.82 |
| 17      | 17  | M   | 3        | 17.72         |
| 18      | 41  | F   | 3        | 15.48         |
| 19      | 4   | M   | 3        | 18.26         |
| 20      | 4   | F   | 3        | 20.53         |
| 21      | 7   | F   | 3 + 4    | 26.11 / 18.07 |
| 22      | 30  | F   | 2 + 4    | 22.11 / 12.57 |
| 23      | 3   | M   | 3        | 27.70         |
| 24      | 34  | F   | 4        | 16.45         |
| 25      | 25  | F   | 3 + 4    | 15.78 / 16.69 |
| 26      | 28  | F   | 3 + 4    | 16.82 / 13.36 |
| 27      | 25  | F   | 2 + 3    | 37.15 / 18.78 |
| 28      | 23  | F   | 2        | 37.15         |
| 29      | 2   | M   | 1        | 15.49         |
| 30      | 18  | F   | 4        | 22.90         |
| 31      | 3   | F   | 4        | 27.42         |
| 32      | 7   | M   | 4        | 34.99         |
| 33      | 10  | M   | 1        | 15.00         |
| 34      | 25  | F   | 2        | 35.92         |
| 35      | 39  | F   | 1        | 19.16         |
| 36      | 17  | M   | 1        | 9.09          |
| 37      | 36  | F   | 2        | 37.12         |
| 38      | 23  | F   | 1        | 15.15         |
| 39      | 32  | F   | 1        | 31.45         |
| 40      | 58  | M   | 2        | 32.84         |
| 41      | 9   | F   | 1 + 2    | 22.12 / 31.75 |
| 42      | 7   | F   | 1        | 16.94         |
| 43      | 25  | F   | 2        | 37.42         |
| 44      | 19  | M   | 4        | 20.90         |
| 45      | 9   | M   | 4        | 28.11         |
| 46      | 1   | M   | 4        | 19.57         |

|    |    |   |           |                       |
|----|----|---|-----------|-----------------------|
| 47 | 43 | M | 4         | 31.97                 |
| 48 | 24 | M | 4         | 35.99                 |
| 49 | 22 | F | 4         | 25.31                 |
| 50 | 3  | F | 4         | 17.93                 |
| 51 | 4  | M | 4         | 33.84                 |
| 52 | 7  | M | 4         | 11.72                 |
| 53 | 4  | F | 3 + 4     | 27.98 / 27.11         |
| 54 | 16 | M | 3         | 29.32                 |
| 55 | 18 | F | 3 + 4     | 17.69 / 16.63         |
| 56 | 10 | F | 2 + 3 + 4 | 37.46 / 22.59 / 19.69 |
| 57 | 21 | F | 3         | 28.99                 |
| 58 | 16 | M | 3         | 27.83                 |
| 59 | 8  | F | 3         | 27.99                 |
| 60 | 13 | M | 4         | 19.81                 |
| 61 | 17 | F | 3 + 4     | 26.85 / 26.91         |
| 62 | 2  | M | 3         | 15.92                 |
| 63 | 39 | M | 3         | 15.88                 |
| 64 | 8  | M | 3 + 4     | 31.14 / 15.66         |
| 65 | 6  | F | 3         | 21.74                 |
| 66 | 15 | F | 2 + 3     | 36.34 / 18.91         |
| 67 | 25 | M | 4         | 30.54                 |
| 68 | 4  | F | 3 + 4     | 14.83 / 31.19         |
| 69 | 14 | F | 3 + 4     | 15.16 / 26.80         |
| 70 | 22 | F | 3         | 17.18                 |
| 71 | 2  | M | 3 + 4     | 21.39 / 16.25         |
| 72 | 5  | M | 3 + 4     | 27.55 / 26.85         |
| 73 | 17 | M | 3         | 31.83                 |
| 74 | 12 | M | 3 + 4     | 31.37 / 26.99         |
| 75 | 37 | M | 3         | 27.86                 |
| 76 | 10 | M | 3         | 30.39                 |
| 77 | 17 | F | 3 + 4     | 19.04 / 26.88         |
| 78 | 32 | F | 3 + 4     | 18.76 / 15.56         |
| 79 | 24 | F | 3 + 4     | 16.29 / 34.99         |
| 80 | 23 | F | 3         | 15.50                 |
| 81 | 9  | M | 3         | 26.05                 |
| 82 | 6  | F | 3         | 31.94                 |
| 83 | 22 | M | 3         | 27.23                 |
| 84 | 10 | F | 3         | 26.62                 |
| 85 | 22 | F | 4         | 31.95                 |
| 86 | 21 | M | 3         | 27.66                 |
| 87 | 4  | M | 3         | 23.84                 |
| 88 | 12 | M | 4         | 26.72                 |
| 89 | 3  | F | 3         | 22.56                 |
| 90 | 5  | F | 3 + 4     | 26.90 / 23.66         |
| 91 | 23 | M | 1         | 37.75                 |
| 92 | 21 | F | 2         | 31.49                 |
| 93 | 4  | F | 1         | 32.73                 |
| 94 | 60 | F | 1         | 30.38                 |

|     |    |   |   |       |
|-----|----|---|---|-------|
| 95  | 33 | F | 2 | 30.61 |
| 96  | 7  | M | 2 | 31.61 |
| 97  | 1  | M | 2 | 10.91 |
| 98  | 3  | F | 4 | 31.44 |
| 99  | 31 | F | 4 | 22.56 |
| 100 | 29 | F | 4 | 25.87 |
| 101 | 19 | F | 4 | 32.84 |
| 102 | 4  | M | 4 | 19.60 |
| 103 | 5  | M | 4 | 34.31 |
| 104 | 26 | F | 4 | 29.72 |
| 105 | 6  | F | 4 | 25.93 |
| 106 | 2  | F | 4 | 11.50 |
| 107 | 13 | F | 4 | 33.37 |
| 108 | 1  | M | 3 | 24.14 |
| 109 | 4  | M | 3 | 27.85 |
| 110 | 43 | M | 3 | 26.96 |

---

| Site    | Site status | Sampling month |
|---------|-------------|----------------|
| Yaounde | Urban       | December 2019  |
| Yaounde | Urban       | December 2019  |
| Yaounde | Urban       | December 2019  |
| Yaounde | Urban       | January 2020   |
| Yaounde | Urban       | February 2020  |
| Yaounde | Urban       | February 2020  |
| Yaounde | Urban       | January 2020   |
| Yaounde | Urban       | February 2020  |
| Yaounde | Urban       | March 2020     |
| Yaounde | Urban       | March 2020     |
| Yaounde | Urban       | March 2020     |
| Yaounde | Urban       | February 2020  |
| Yaounde | Urban       | February 2020  |
| Yaounde | Urban       | March 2020     |
| Yaounde | Urban       | March 2020     |
| Yaounde | Urban       | March 2020     |
| Yaounde | Urban       | March 2020     |
| Yaounde | Urban       | March 2020     |
| Yaounde | Urban       | March 2020     |
| Yaounde | Peri-urban  | June 2020      |
| Yaounde | Peri-urban  | June 2020      |
| Yaounde | Urban       | June 2020      |
| Yaounde | Urban       | June 2020      |
| Yaounde | Peri-urban  | June 2020      |
| Yaounde | Peri-urban  | July 2020      |
| Yaounde | Peri-urban  | August 2020    |
| Yaounde | Peri-urban  | October 2020   |
| Yaounde | Peri-urban  | October 2021   |
| Yaounde | Peri-urban  | November 2020  |
| Yaounde | Urban       | December 2020  |
| Yaounde | Urban       | December 2020  |
| Yaounde | Peri-urban  | December 2020  |
| Yaounde | Urban       | December 2020  |
| Yaounde | Urban       | December 2020  |
| Yaounde | Peri-urban  | January 2021   |
| Yaounde | Urban       | January 2021   |
| Yaounde | Peri-urban  | January 2021   |

|          |            |               |
|----------|------------|---------------|
| Yaounde  | Peri-urban | January 2021  |
| Yaounde  | Urban      | January 2021  |
| Yaounde  | Peri-urban | February 2021 |
| Yaounde  | Peri-urban | February 2021 |
| Yaounde  | Peri-urban | February 2021 |
| Yaounde  | Peri-urban | February 2021 |
| Yaounde  | Peri-urban | February 2021 |
| Yaounde  | Peri-urban | February 2021 |
| Yaounde  | Peri-urban | February 2021 |
| Yaounde  | Urban      | January 2021  |
| Yaounde  | Urban      | February 2021 |
| Yaounde  | Peri-urban | March 2021    |
| Yaounde  | Peri-urban | March 2021    |
| Yaounde  | Peri-urban | March 2021    |
| Yaounde  | Peri-urban | March 2021    |
| Yaounde  | Peri-urban | March 2021    |
| Yaounde  | Peri-urban | March 2021    |
| Yaounde  | Peri-urban | March 2021    |
| Yaounde  | Peri-urban | March 2021    |
| Yaounde  | Peri-urban | March 2021    |
| Yaounde  | Peri-urban | March 2021    |
| Yaounde  | Peri-urban | March 2021    |
| Yaounde  | Peri-urban | April 2021    |
| Yaounde  | Peri-urban | May 2021      |
| Yaounde  | Peri-urban | May 2021      |
| Yaounde  | Peri-urban | May 2021      |
| Yaounde  | Peri-urban | May 2021      |
| Yaounde  | Peri-urban | May 2021      |
| Dizangue | Rural      | July 2021     |
| Dizangue | Rural      | July 2021     |
| Dizangue | Rural      | July 2021     |
| Dizangue | Rural      | August 2021   |

[illegible]
